# Supplementary material for: Food Categories for Breakfast and Mental Health among Children in Japan: Results from the A-CHILD Study
Source: MDPI journal article supplement (doi:10.3390/nu15051091), 2023-02-22
Supplement: s1 [file s1]

**Table S1.** Results of regression analyses on children's mental health according to types of grain dishes among Japanese school children ( $n = 281$ )

| Food category                        | Behavior problems<br>(SDQ score) | Prosocial behavior<br>(SDQ score) |
|--------------------------------------|----------------------------------|-----------------------------------|
|                                      | coefficient (95%CI)              | coefficient (95%CI)               |
| Model 1                              |                                  |                                   |
| Rice                                 | -7.71 (-15.3 to -0.08)           | -0.18 (-12.3 to 11.90)            |
| Bread                                | -7.12 (-14.70 to 0.46)           | 1.99 (-10.0 to 14.00)             |
| Model 2                              |                                  |                                   |
| Rice                                 | -10.9 (-19.9 to -1.8)            | 0.34 (-14.2 to 14.84)             |
| Bread                                | -7.6 (-16.3 to 1.0)              | 0.48 (-13.3 to 14.31)             |
| Vegetable dishes                     | 0.91 (-4.52 to 6.34)             | 1.00 (-7.7 to 9.70)               |
| Meat, fish, egg, and soy-bean dishes | 0.01 (-6.25 to 6.27)             | -5.69 (-15.7 to 4.35)             |
| Milk and Milk products               | -3.07 (-8.74 to 2.59)            | -1.33 (-10.4 to 7.75)             |
| Fruits                               | -7.07 (-13.8 to -0.37)           | 7.28 (-3.4 to 18.02)              |
| Confectionaries                      | -2.00 (-11.4 to 7.45)            | -4.95 (-20.1 to 10.19)            |

CI, confidence interval; SD, standard deviation; SDQ, Strength and Difficulties Questionnaire.

All variables ranged from 0 to 100.

Model 1: Inclusion of rice and bread dishes with adjustment for child's sex, physical activity, and bedtime, household income and cohabitation status, caregiver's K6, and mother's age and employment.

Model 2: Model 1 with further adjustment for vegetable dishes, fish and meat dishes, milk and milk products, fruits, and confectionaries.
